# Supplementary material for: Dysregulation of PI3K and Hippo signaling pathways synergistically induces chronic pancreatitis via CTGF upregulation
Source: JCI journal article supplement (doi:10.1172/jci143414), 2021-05-25
Supplement: sd1 [file 1]

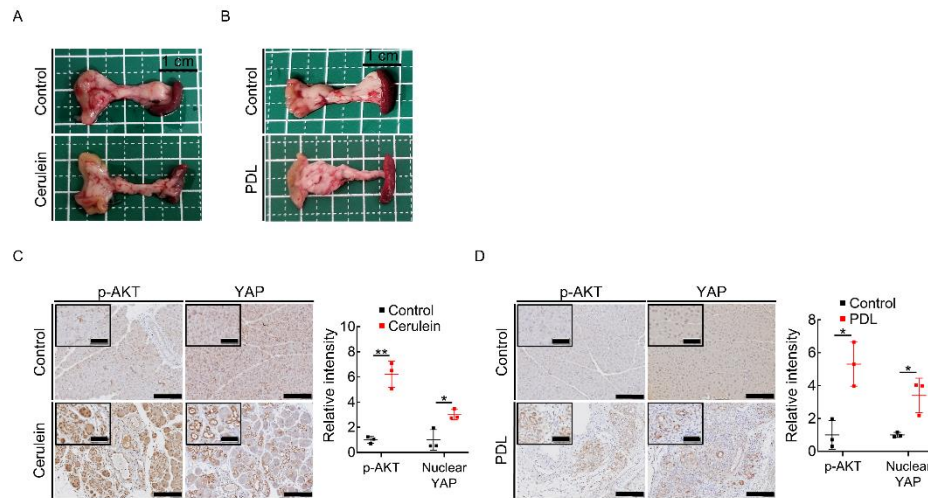

**Supplementary Figure 1. (A-B)** Macroscopic images of the pancreas of mice after repeated cerulein or vehicle (control) injection **(A)** and of mice subjected to PDL surgery or sham surgery **(B)**. **(C-D)** Representative images of p-AKT and nuclear YAP staining of pancreatic tissue in mice after repeated cerulein injection **(C left)** and quantification of the p-AKT and nuclear YAP staining intensity **(C right)**, and in mice subjected to PDL surgery **(D left)** and quantification of the p-AKT and nuclear YAP staining intensity **(D right)**. All data are presented as the means  $\pm$  SDs of results for 3 mice per group. Student's t-test was used to evaluate differences between two groups. \*  $p < 0.05$  and \*\*  $p < 0.005$ . Scale bars: 100  $\mu$ m and 50  $\mu$ m (insets).

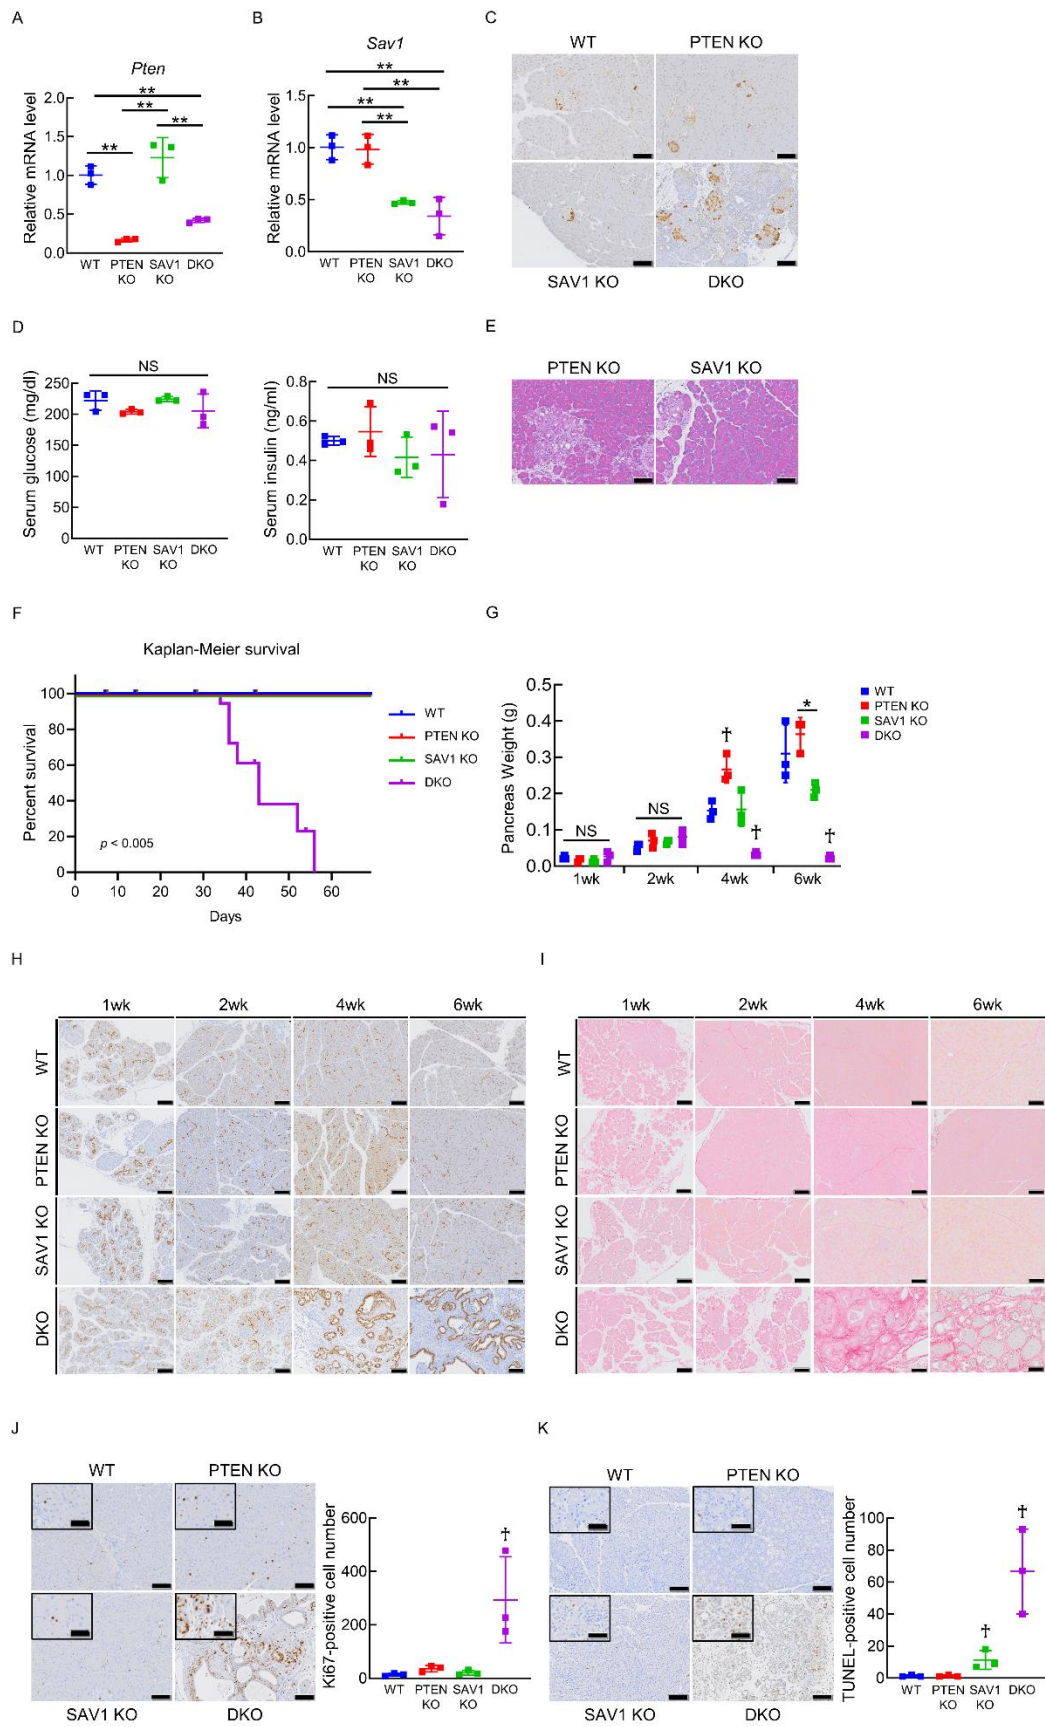

**Supplementary Figure 2.** Pancreatic phenotypes were examined in wild-type (WT) mice, pancreas-specific *Pten* knockout (KO) (PTEN KO) mice, *Sav1* KO (SAV1 KO) mice, and *Pten* and *Sav1* double KO (DKO) mice. **(A)** *Pten* mRNA levels in pancreatic tissue from mice at 6 weeks of age. **(B)** *Sav1* mRNA levels in pancreatic tissue from mice at 6 weeks of age. **(C)** Representative Glucagon staining images of pancreatic tissue at 6 weeks of age. **(D)** Serum glucose and insulin levels at 6 weeks of age. **(E)** Representative images of H&E staining of pancreatic tissue from PTEN KO and SAV1 KO mice at 10 months of age ( $n=3$ ). **(F)** Kaplan-Meier survival curves ( $n=18-27$ ). **(G)** Pancreas weight. **(H-I)** Representative images of SOX9 **(H)** and Sirius red staining **(I)** of pancreatic tissue. **(J)** Representative images of Ki67 staining of pancreatic tissue **(left)** and quantification of the Ki67-positive cell number **(right)**. **(K)** Representative images of TUNEL staining of pancreatic tissue **(left)** and quantification of the TUNEL-positive cell number **(right)**. All data are presented as the means  $\pm$  SDs of results for 3 mice per group. One-way analysis of variance (ANOVA) with Tukey's post hoc test was used to compare differences among four groups **(A, B, D, G, J, and K)**. The survival data were analyzed using the log-rank test **(F)**. \*  $p < 0.05$ , \*\*  $p < 0.005$ , and  $^{\dagger} p < 0.05$  versus all groups. Scale bars: 100  $\mu\text{m}$  and 50  $\mu\text{m}$  (insets).

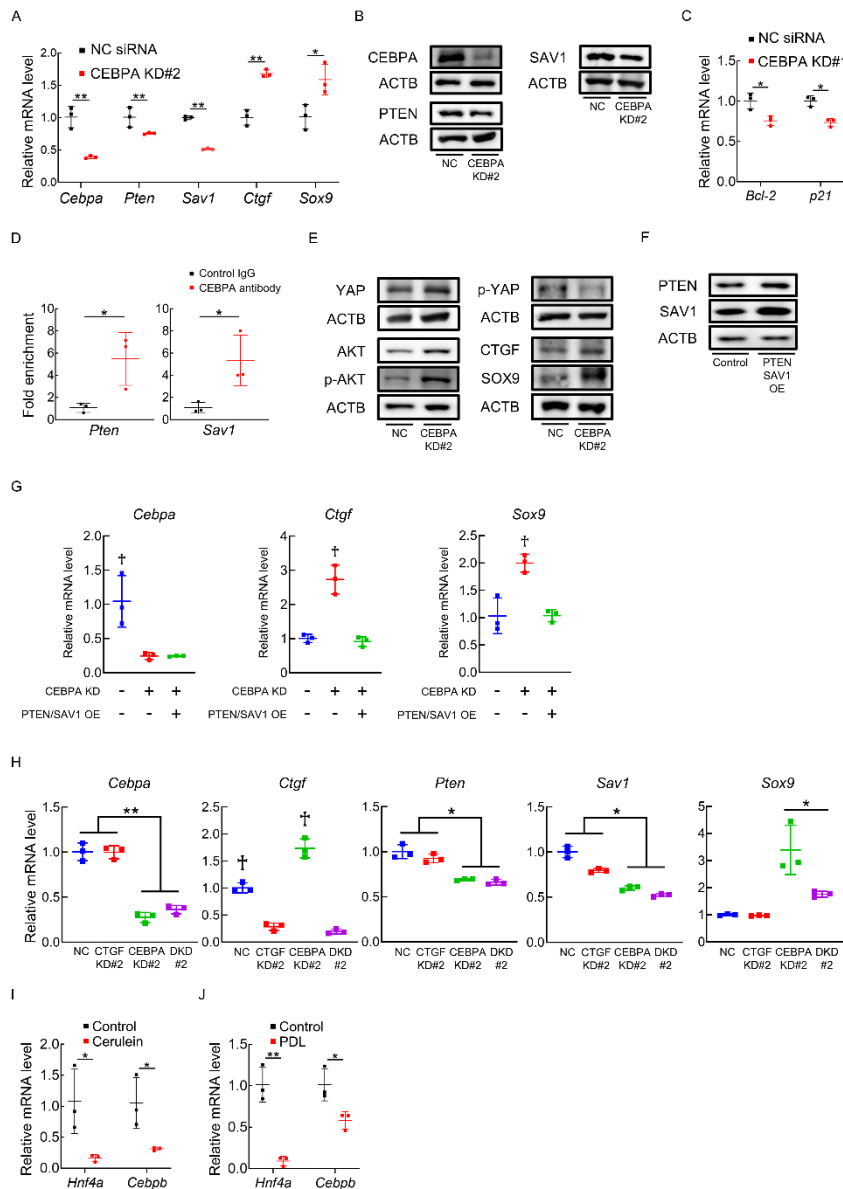

**Supplementary Figure 3. (A)** mRNA levels of *Cebpa*, *Pten*, *Sav1*, *Ctgf*, and *Sox9* in 266-6 cells 3 days after transfection with negative control (NC) siRNA or *Cebpa* siRNA (#2) (CEBPA knockdown [KD] #2). **(B)** Protein levels of CEBPA, PTEN, SAV1, and ACTB in 266-6 cells 3 days after transfection with NC siRNA or *Cebpa* siRNA (#2) (CEBPA KD#2). **(C)** mRNA levels of *Bcl-2* and *p21* in 266-6 cells 3 days after transfection with NC siRNA or *Cebpa* siRNA (#1) (CEBPA KD#1). **(D)** Quantification of the chromatin immunoprecipitation assay to show direct

41 binding of CEBPA protein to murine *Pten* and *Sav1* promoter DNA using the antibody against  
 42 CEBPA compared with the immunoglobulin G control. **(E)** Protein levels of YAP, p-YAP, AKT,  
 43 p-AKT, CTGF, SOX9, and ACTB in 266-6 cells 3 days after transfection with NC siRNA or  
 44 *Cebpa* siRNA (#2) (CEBPA KD#2). **(F)** Protein levels of PTEN, SAV1, and ACTB in 266-6  
 45 cells transfected with the control vector or both *Pten* and *Sav1* cDNA expression vectors  
 46 (PTEN SAV1 overexpression [OE]). **(G)** mRNA levels of *Cebpa*, *Ctgf*, and *Sox9* in 266-6 cells  
 47 transfected with the control vector, *Cebpa* siRNA (CEBPA KD), or both *Pten* and *Sav1* cDNA  
 48 expression vectors (PTEN/SAV1 OE) and *Cebpa* siRNA (CEBPA KD). **(H)** mRNA levels of  
 49 *Cebpa*, *Ctgf*, *Pten*, *Sav1*, and *Sox9* in 266-6 cells 3 days after transfection with NC siRNA,  
 50 *Ctgf* siRNA (#2) (CTGF KD#2), *Cebpa* siRNA (#2) (CEBPA KD#2), or both *Cebpa* (#2) and  
 51 *Ctgf* (#2) siRNAs (double KD [DKD] #2). **(I-J)** *Hnf4a* and *Cebpb* mRNA levels in pancreatic  
 52 tissue in mice after repeated cerulein or vehicle (control) injection **(I)** and in mice subjected  
 53 to PDL surgery or sham surgery **(J)**. Blots run in parallel contemporaneously or run at  
 54 different times with loading control for each gel are shown. All data are presented as the  
 55 means  $\pm$  SDs of results for 3 samples per group. Student's t-test was used to evaluate  
 56 differences between two groups **(A, C, D, I, and J)**. One-way analysis of variance (ANOVA)  
 57 with Tukey's post hoc test was used to compare differences among three or four groups **(G**  
 58 **and H)**. \*  $p < 0.05$ , \*\*  $p < 0.005$ , and  $^{\dagger} p < 0.05$  versus all groups.

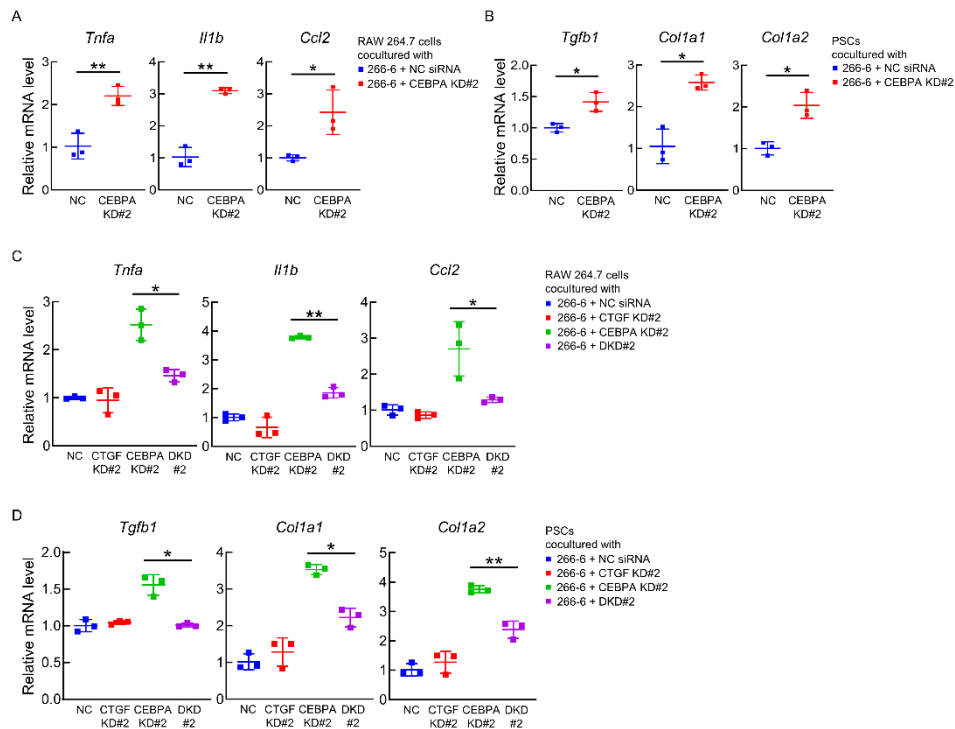

**Supplementary Figure 4. (A)** mRNA levels of *Tnfa*, *Il1b*, and *Ccl2* in RAW 264.7 cells 2 days after coculture with 266-6 cells transfected with negative control (NC) siRNA or *Cebpa* siRNA (#2) (CEBPA knockdown [KD] #2). **(B)** mRNA levels of *Tgfb1*, *Col1a1*, and *Col1a2* in PSCs isolated from mouse pancreata 2 days after coculture with 266-6 cells transfected with NC siRNA or *Cebpa* siRNA (#2) (CEBPA KD#2). **(C)** mRNA levels of *Tnfa*, *Il1b*, and *Ccl2* in RAW 264.7 cells 2 days after coculture with 266-6 cells transfected with NC siRNA, *Ctgf* siRNA (#2) (CTGF KD#2), *Cebpa* siRNA (#2) (CEBPA KD#2) or both *Cebpa* (#2) and *Ctgf* (#2) siRNAs (double KD [DKD] #2). **(D)** mRNA levels of *Tgfb1*, *Col1a1*, and *Col1a2* in PSCs isolated from mouse pancreata 2 days after coculture with 266-6 cells transfected with NC siRNA, *Ctgf* siRNA (#2) (CTGF KD#2), *Cebpa* siRNA (#2) (CEBPA KD#2) or both *Cebpa* (#2)

and *Ctgf* (#2) siRNAs (DKD#2). All data are presented as the means  $\pm$  SDs of results for 3 samples per group. Student's t-test was used to evaluate differences between two groups (**A and B**). One-way analysis of variance (ANOVA) with Tukey's post hoc test was used to compare differences among four groups (**C and D**). \*  $p < 0.05$  and \*\*  $p < 0.005$ .

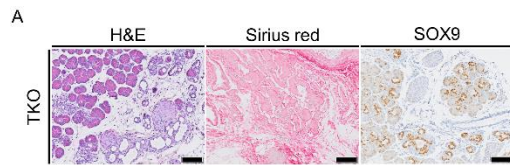

**Supplementary Figure 5. (A)** Representative images of H&E, Sirius red, and SOX9 staining of pancreatic tissue from *Pten*, *Sav1* and *Ctgf* triple knockout (TKO) mice at 10 months of age ( $n=3$ ). Scale bars: 100  $\mu$ m.

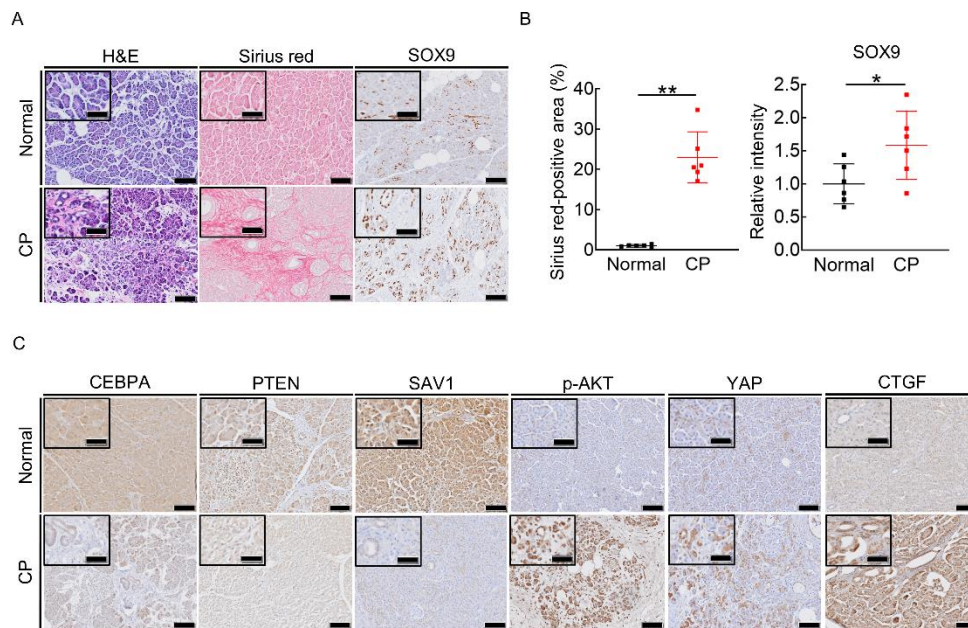

**Supplementary Figure 6. (A-B)** Representative images of H&E, Sirius red, and SOX9 staining of pancreatic tissue from the normal pancreatic regions obtained from pancreatic neuroendocrine tumor patients or from the chronic pancreatic regions obtained from chronic pancreatitis patients **(A)** and quantification of the Sirius red-positive area **(B left)** and SOX9 staining intensity **(B right)**. **(C)** Representative images of CEBPA, PTEN, SAV1, p-AKT, nuclear YAP, and CTGF staining of pancreatic tissue from the normal pancreatic regions obtained from pancreatic neuroendocrine tumor patients or from the chronic pancreatic regions obtained from chronic pancreatitis patients. All data are presented as the means  $\pm$  SDs of results for 6 samples per group. Student's t-test was used to evaluate differences between two groups. \*  $p < 0.05$  and \*\*  $p < 0.005$ . Scale bars: 100  $\mu$ m and 50  $\mu$ m (insets).

117 **Supplementary Table 1. List of antibodies**

| Antibody  | Host   | Dilution     | Cat. no.   | Supplier          |
|-----------|--------|--------------|------------|-------------------|
| AKT       | Rabbit | 1:1000 (WB)  | 4685       | Cell Signaling    |
| p-AKT     | Rabbit | 1:2000 (WB)  | 4060       | Cell Signaling    |
|           | Rabbit | 1:50 (IHC)   | 38449      | Abcam             |
| ACTB      | Mouse  | 1:10000 (WB) | A5316      | Sigma-Aldrich     |
| CEBPA     | Rabbit | 1:1000 (WB)  | 8178       | Cell Signaling    |
|           | Rabbit | 1:200 (IHC)  | 140479     | Abcam             |
| CTGF      | Rabbit | 1:1000 (WB)  | 227180     | Abcam             |
|           |        | 1:100 (IHC)  |            |                   |
| Glucagon  | Mouse  | 1:100 (IHC)  | 10988      | Abcam             |
| Ki67      | Rabbit | 1:200 (IHC)  | 12202      | Cell Signaling    |
| LATS1     | Rabbit | 1:1000 (WB)  | 3477       | Cell Signaling    |
| LATS2     | Rabbit | 1:1000 (WB)  | PA5-38804  | Invitrogen        |
| p-LATS1/2 | Rabbit | 1:1000 (WB)  | PA5-64591  | Invitrogen        |
| PTEN      | Rabbit | 1:1000 (WB)  | 9188       | Cell Signaling    |
|           | Rabbit | 1:100 (IHC)  | 170941     | Abcam             |
| SAV1      | Rabbit | 1:1000 (WB)  | 13301      | Cell Signaling    |
|           | Mouse  | 1:150 (IHC)  | NBP2-45687 | Novus Biologicals |
| SOX9      | Rabbit | 1:1000 (WB)  | 82630      | Cell Signaling    |
|           | Rabbit | 1:1000 (IHC) | 185966     | Abcam             |
| YAP       | Rabbit | 1:1000 (WB)  | 14074      | Cell Signaling    |
|           |        | 1:400 (IHC)  |            |                   |
| p-YAP     | Rabbit | 1:1000 (WB)  | 13008      | Cell Signaling    |

118

119

120

121

122

123

124

**Supplementary Table 2. List of TaqMan PCR probes**

| Gene name     | TaqMan PCR probe | Supplier           |
|---------------|------------------|--------------------|
| <i>Actb</i>   | Mm02619580_g1    | Applied Biosystems |
| <i>Bcl-2</i>  | Mm00477631_m1    | Applied Biosystems |
| <i>Ccl2</i>   | Mm00441242_m1    | Applied Biosystems |
| <i>Cd68</i>   | Mm03047343_m1    | Applied Biosystems |
| <i>Cebpa</i>  | Mm00514283_m1    | Applied Biosystems |
| <i>Cebpb</i>  | Mm00843434_s1    | Applied Biosystems |
| <i>Col1a1</i> | Mm00801666_g1    | Applied Biosystems |
| <i>Col1a2</i> | Mm01165187_m1    | Applied Biosystems |
| <i>Ctgf</i>   | Mm001192933_g1   | Applied Biosystems |
| <i>Hnf4a</i>  | Mm01247712_m1    | Applied Biosystems |
| <i>Il1b</i>   | Mm00434228_m1    | Applied Biosystems |
| <i>p21</i>    | Mm00432448_m1    | Applied Biosystems |
| <i>Pten</i>   | Mm00477208_m1    | Applied Biosystems |
| <i>Sav1</i>   | Mm00499038_m1    | Applied Biosystems |
| <i>Sox9</i>   | Mm00448840_m1    | Applied Biosystems |
| <i>Tgfb1</i>  | Mm01178820_m1    | Applied Biosystems |
| <i>Tnfa</i>   | Mm00443258_m1    | Applied Biosystems |

137 **Supplementary Table 3. List of siRNAs**

| Gene              | siRNA ID | Sequences of siRNA (5'→3') |                        | Supplier                 |
|-------------------|----------|----------------------------|------------------------|--------------------------|
| <i>Cebpa</i> (#1) | s63855   | sense                      | ACUCAAAACUCGCUCCUUUTT  | Thermo Fisher Scientific |
|                   |          | antisense                  | AAAGGAGCGAGUUUUGAGUAT  |                          |
| <i>Cebpa</i> (#2) | s63854   | sense                      | AAAGCUGAGUUUGUGAGUUATT | Thermo Fisher Scientific |
|                   |          | antisense                  | UACUCACAACUCAGCUUUCT   |                          |
| <i>Ctgf</i> (#1)  | s66077   | sense                      | AGAAUAUGAUGUUCAUCAATT  | Thermo Fisher Scientific |
|                   |          | antisense                  | UUGAUGAACAUCAUAUUCUTT  |                          |
| <i>Ctgf</i> (#2)  | s66076   | sense                      | GGCAAAAAGUGCAUCCGGATT  | Thermo Fisher Scientific |
|                   |          | antisense                  | UCCGGAUGCACUUUUUGCCCT  |                          |
| <i>Lats1</i>      | s201588  | sense                      | CCAUAUGAGUCAGUAAGUATT  | Thermo Fisher Scientific |
|                   |          | antisense                  | UACUUACUGACUCAUAUGGAG  |                          |
| <i>Lats2</i>      | s78350   | sense                      | CCAUCGACUUUUUCCCGUGATT | Thermo Fisher Scientific |
|                   |          | antisense                  | UCACGGGAAAAGUCGAUGGTG  |                          |
| <i>Pten</i>       | s72350   | sense                      | GUAUAGAGCGUGCAGAUAAATT | Thermo Fisher Scientific |
|                   |          | antisense                  | UUAUCUGCACGCUCUAUACTG  |                          |
| <i>Sav1</i>       | s204977  | sense                      | AGAUUACAGAUUUUAUGAATT  | Thermo Fisher Scientific |
|                   |          | antisense                  | UUCAUAAUAUCUGUAAUCUTC  |                          |

138
